# Supplementary material for: Prognostic Score Predicts Survival in HPV-Negative Head and Neck Squamous Cell Cancer Patients
Source: PubMed Central journal article supplement — Int J Biol Sci. 2019 May 12;15(7):1336–44. doi: 10.7150/ijbs.33329 (PMC6643134; doi:10.7150/ijbs.33329), 2019-05-12
Supplement: ijbsv15p1336s1.pdf [file ijbsv15p1336s1.pdf]

**Supplementary figure 1** Receiver operating characteristic (ROC) curve of the final model in development. The final model presented a good discrimination (AUC = 0.76; 95% CI 0.70, 0.81). AUC: Area under the ROC curve.

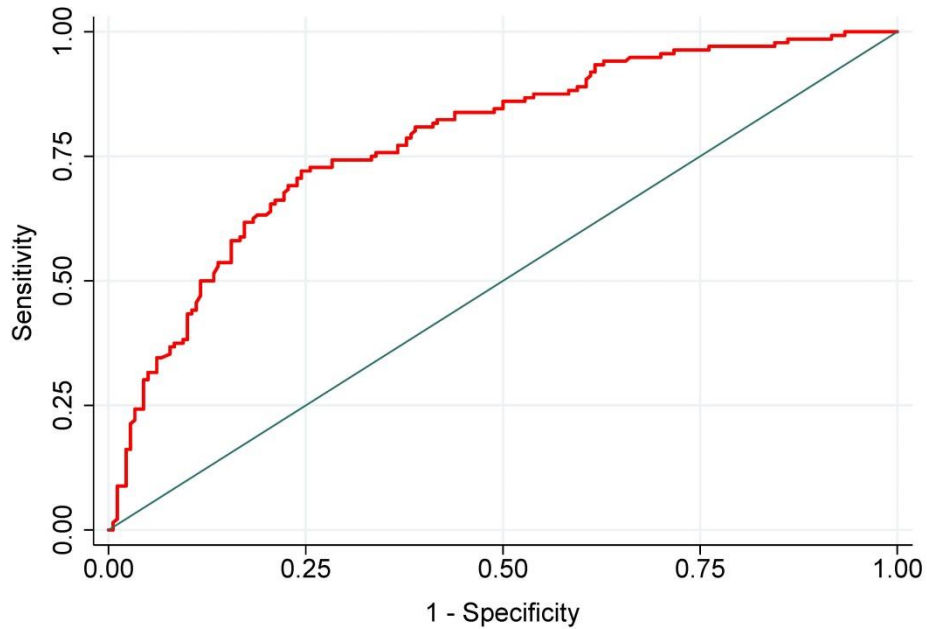

**Supplementary table 1.** Baseline characteristics and outcome (mortality), comparing patients who were not included due to incomplete data with those were included in the final multivariate model.

| Variable                         | All         | Excluded    | Included    | P-value     |
|----------------------------------|-------------|-------------|-------------|-------------|
|                                  | (n=400)     | (n=65)      | (n=335)     |             |
| Age (years), median (IQR)        | 61 (53, 68) | 63 (53, 72) | 61 (53, 67) | 0.59        |
| Gender                           |             |             |             | <b>0.04</b> |
| Female                           | 107 (26.8)  | 24 (36.9)   | 83 (24.8)   |             |
| Male                             | 293 (73.3)  | 41 (63.1)   | 252 (75.2)  |             |
| Race                             |             |             |             | 0.67        |
| White                            | 333 (83.3)  | 53 (81.5)   | 280 (83.6)  |             |
| Asian                            | 11 (2.8)    | 1 (1.5)     | 10 (3.0)    |             |
| Black or African American        | 42 (10.5)   | 8 (12.3)    | 34 (10.1)   |             |
| American Indian or Alaska native | 2 (0.5)     | 1 (1.5)     | 1 (0.3)     |             |
| Unknown                          | 12 (3.0)    | 2 (3.1)     | 10 (3.0)    |             |

|                               |            |           |            |             |
|-------------------------------|------------|-----------|------------|-------------|
| Tobacco use                   |            |           |            | <b>0.51</b> |
| No                            | 80 (20.0)  | 16 (24.6) | 64 (19.1)  |             |
| Yes                           | 311 (77.8) | 47 (72.3) | 264 (78.8) |             |
| Unknown                       | 9 (2.3)    | 2 (3.1)   | 7 (2.1)    |             |
| Excessive alcohol consumption |            |           |            | <b>0.42</b> |
| No                            | 242 (60.5) | 43 (66.2) | 199 (59.4) |             |
| Yes                           | 45 (11.3)  | 8 (12.3)  | 37 (11.0)  |             |
| Unknown                       | 113 (28.2) | 14 (21.5) | 99 (29.6)  |             |
| Laterality                    |            |           |            | <b>0.39</b> |
| Left                          | 108 (27.0) | 15 (23.1) | 93 (27.8)  |             |
| Right                         | 106 (26.5) | 22 (33.8) | 84 (25.1)  |             |
| Midline                       | 31 (7.8)   | 3 (4.6)   | 28 (8.4)   |             |
| Unknown                       | 155 (38.8) | 25 (38.5) | 130 (38.8) |             |
| *OPSCC                        |            |           |            | <b>0.38</b> |
| No                            | 264 (66.0) | 46 (70.8) | 218 (65.1) |             |
| Yes                           | 136 (34.0) | 19 (29.2) | 117 (34.9) |             |
| **LSCC                        |            |           |            | <b>0.37</b> |
| No                            | 295 (73.8) | 45 (69.2) | 250 (74.6) |             |
| Yes                           | 105 (26.3) | 20 (30.8) | 85 (25.4)  |             |
| Dead                          |            |           |            | <b>0.03</b> |
| No                            | 222 (55.5) | 28 (43.1) | 194 (57.9) |             |
| Yes                           | 178 (44.5) | 37 (56.9) | 141 (42.1) |             |

\*OPSCC: Oropharyngeal squamous cell carcinoma; \*\*LSCC: Laryngeal squamous cell carcinoma;

Significant p values (p<0.05) are in bold.
